# Supplementary material
Source: PubMed Central journal article supplement (PMC3220749)
Supplement: NIHMS327109-supplement-Supp_Fig_S1-S8___Table_S1-S3.pdf [file NIHMS327109-supplement-Supp_Fig_S1-S8___Table_S1-S3.pdf]

**Supplementary Figure S1. Binding of rPMT to lipid extracts from Vero cells.** Lipid extracts from Vero cells were developed on TLC plates with ternary solvent systems of chloroform/methanol/0.05M CaCl<sub>2</sub> at the indicated ratios. The TLC plates were then blocked with BSA and overlaid with <sup>125</sup>I-rPMT, as described in the experimental section. I, phosphorimage of <sup>125</sup>I-rPMT. C, CuSO<sub>4</sub>-stained image after recording the autoradiogram. Bands A, B, C are three major lipid components showing affinity for rPMT.

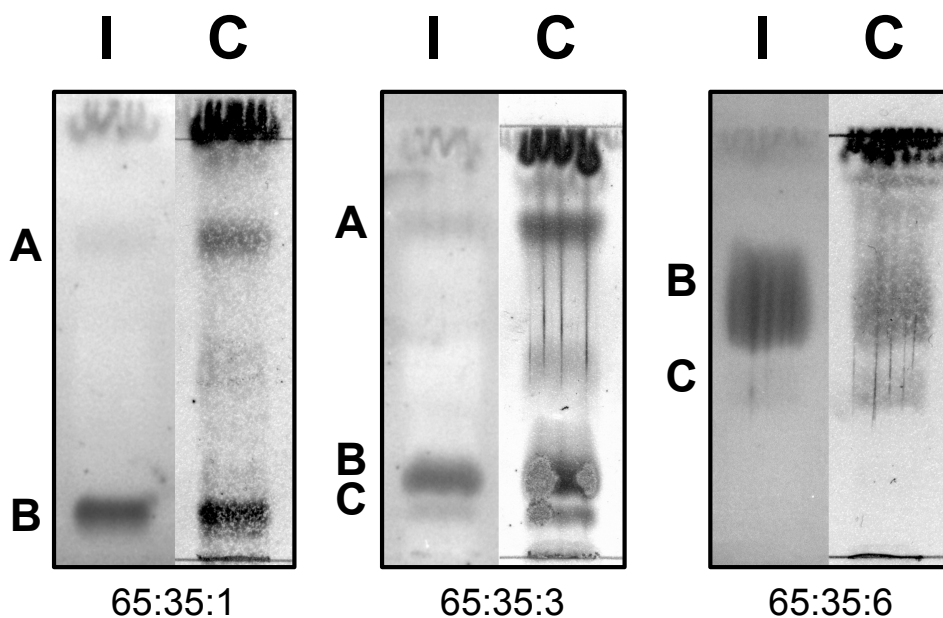

**Supplementary Figure S2. Binding of rPMT to gangliosides.** Triple replicas of TLC plates loaded with: lane 1, GM1 (50  $\mu\text{g}$ ); lane 2, GM2 (50  $\mu\text{g}$ ); lane 3, GM3 (bottom band) plus two forms of Lac-Cer (upper bands) (50  $\mu\text{g}$  each); and lane 4, bovine brain gangliosides (50  $\mu\text{g}$ ). The plates were developed in solvent system 65:30:1.5 (v/v/v, chloroform/methanol/0.05%  $\text{CaCl}_2$ ). Left: image of Orcinol-stained TLC plate; Middle: autoradiogram after incubation with  $^{125}\text{I}$ -rPMT at 4°C for 16 hr; Right: autoradiogram after incubation with  $^{125}\text{I}$ -rPMT at 37°C for 1 hr.

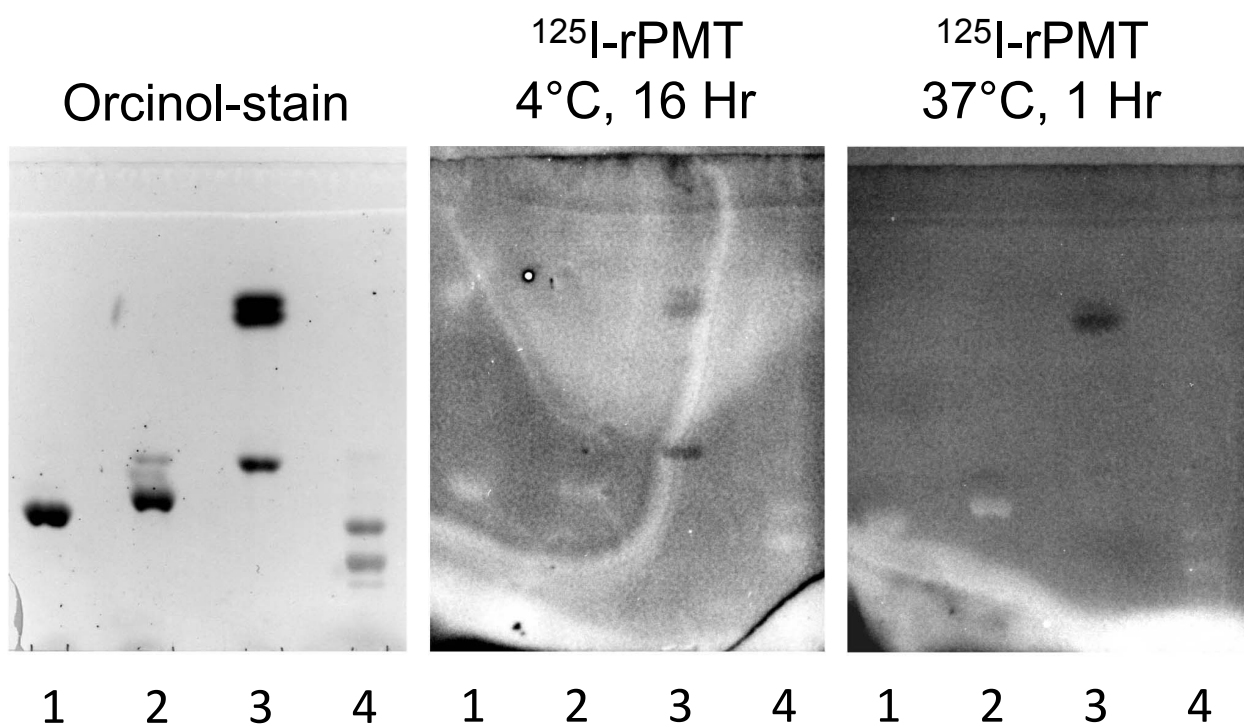

**Supplementary Figure S3. Binding of PMT and PMT fragments to nonpolar lipid components.** Stearic acid (SA), 1-stearoyl-*rac*-glycerol (MG), 1,2-distearoyl-*rac*-glycerol (DG) and cholesterol (CHL) (20  $\mu$ g each) were loaded on the TLC plate and developed in a solvent system of 94:6 (v/v, chloroform/methanol), as described in the experimental section. Left: image of CuSO<sub>4</sub>-stained TLC plate; Right: autoradiogram after incubation with <sup>125</sup>I-rPMT.

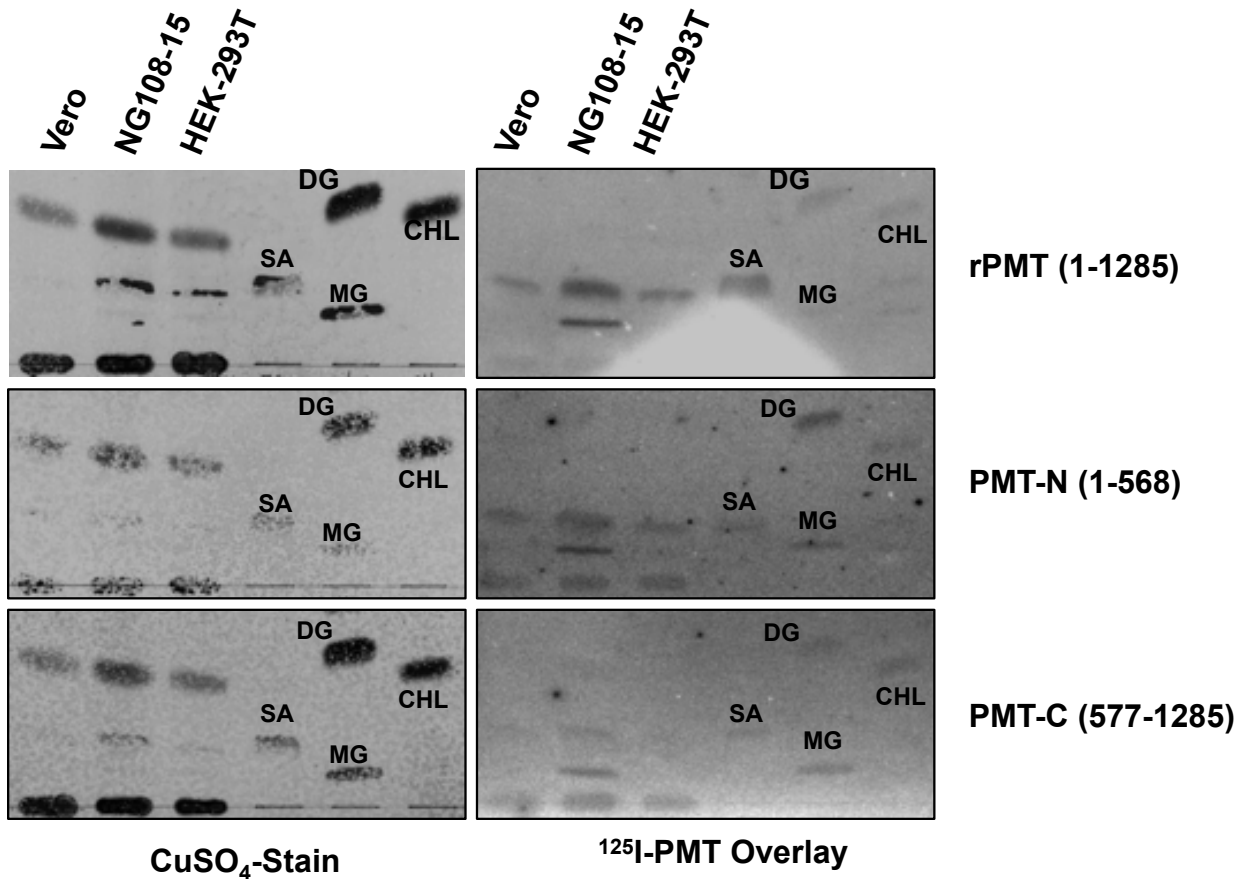

**Supplementary Figure S4. Binding of PMT and PMT fragments to less polar ceramides.** Ceramide I (CerI), ceramide II (CerII), glucosylceramide (GlcC), galactosylceramide (GalC) and lactosylceramide (LacC) (20µg each) were loaded on the TLC plate and developed in a solvent system of 85:15:1 (v/v/v, chloroform/methanol/0.05% CaCl<sub>2</sub>), as described in the experimental section. Left: image of CuSO<sub>4</sub>-stained TLC plate; Right: autoradiogram after incubation with <sup>125</sup>I-rPMT.

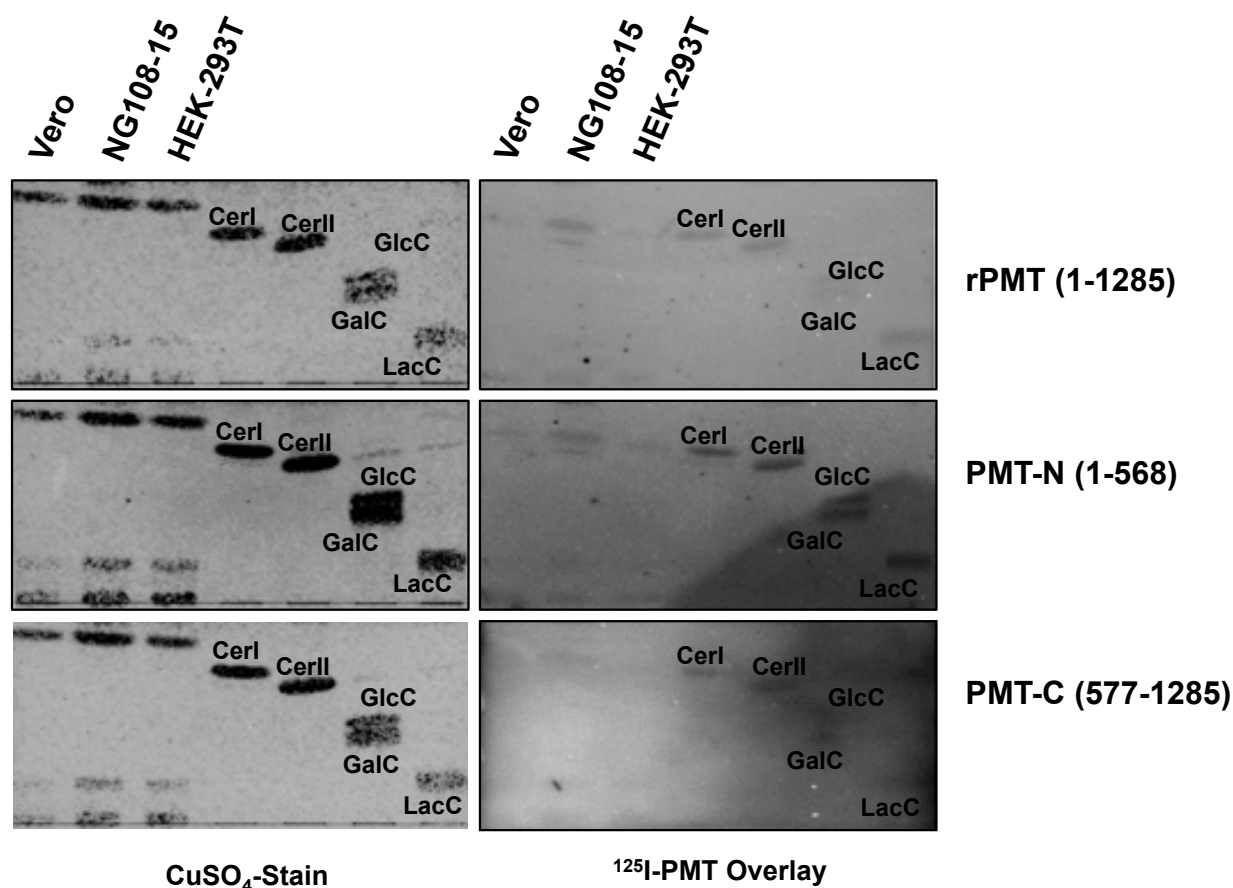

**Supplementary Figure S5. SPR of PMT-N binding to reconstituted phospholipid vesicles on an L1 chip.** Sensorgrams generated with PMT-N binding to vesicles of phospholipids, PC only, PC/PS, or PC/SM (as shown in Figure 6), were fitted to a two-component bi-phasic exponential binding model. The kinetic parameters calculated from a least-squares method were used to construct the theoretical curves for total binding and components corresponding to the rapid component and the slow component.

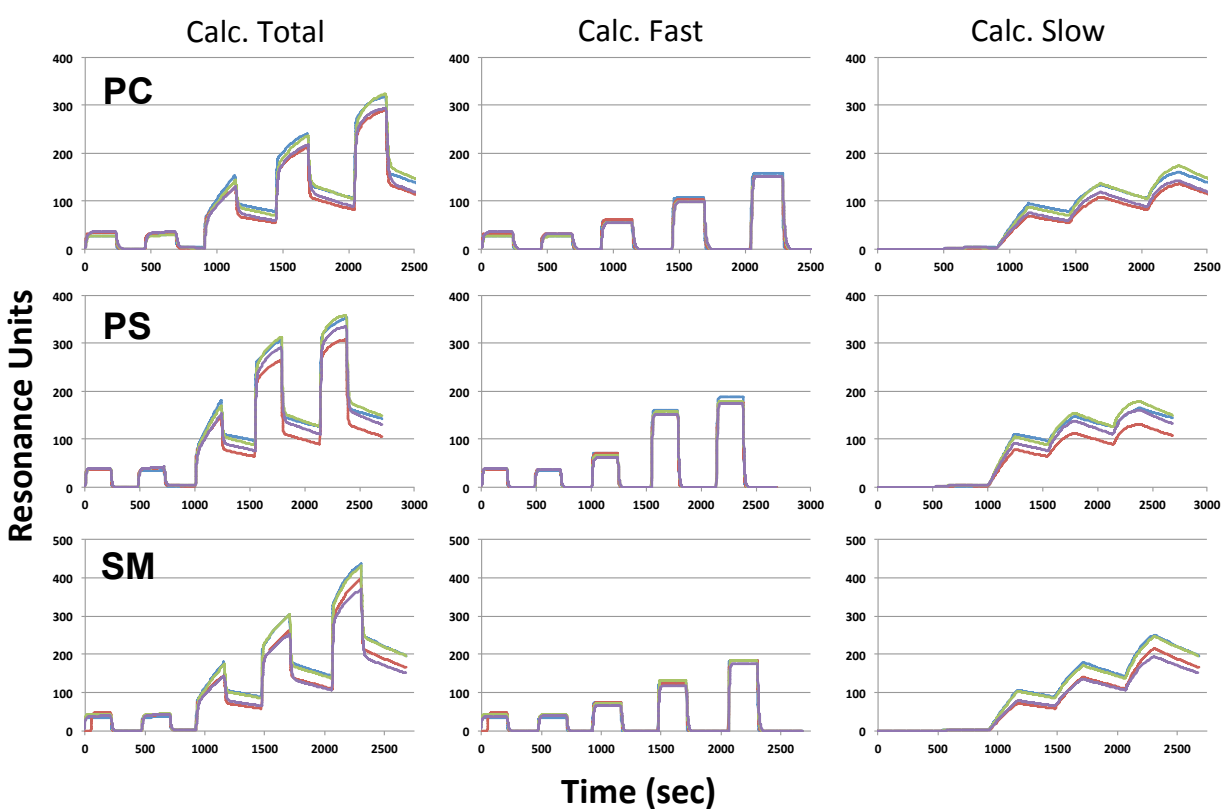

**Supplementary Figure S6. SPR sensorgrams of PMT-N binding to cell membranes.** SPR sensorgrams of PMT-N binding to membrane ghosts of HEK-293T cells on an L1 chip (left) and the calculated curves, generated according to a rapid-and-slow two-component binding model (middle) or a single-component binding model (right).

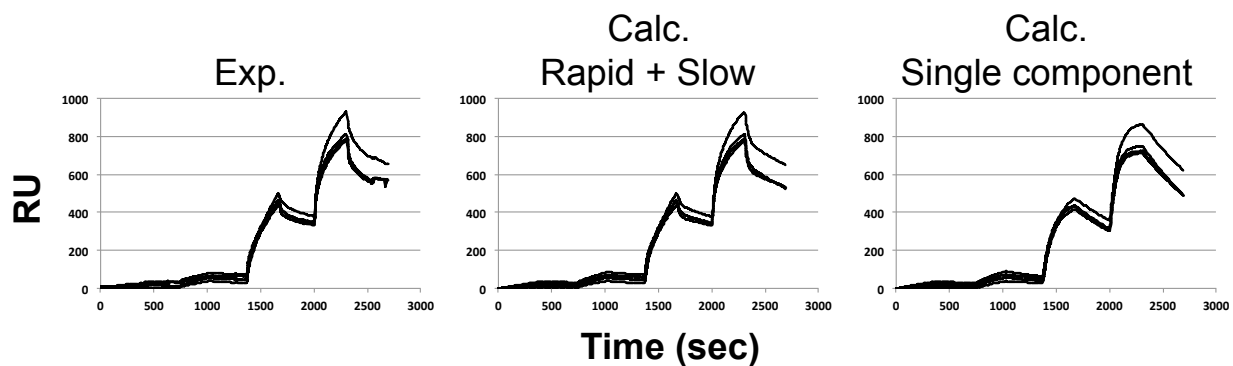

**Supplementary Figure S7. Uptake of radiolabeled PMT into Swiss 3T3 cells.** To confirm the functional viability of radiolabeled rPMT to bind to and enter cells and traffic to endosomes, Swiss 3T3 cells were incubated with  $^{125}\text{I}$ -rPMT at 4°C for 30 min, and then incubated at 37°C for 4 hrs. Cells were harvested and centrifuged to separate pellet (P), containing nucleus, plasma membrane and cellular debris, from cell-free extract supernatant (S), containing cytosol and vesicles. The S fraction was further separated by Opti-prep density gradient centrifugation into 12 fractions (1 mL each). Samples of each fraction collected from the top (fraction #1, low density) to the bottom (fraction #12, high density) were separated by SDS-PAGE. Top panel: phosphorimage of SDS-PAGE gel, showing subcellular localization of radiolabeled PMT. Bottom panel: Western blot of a control SDS-PAGE gel, showing subcellular localization of the endosomal marker EEA1.

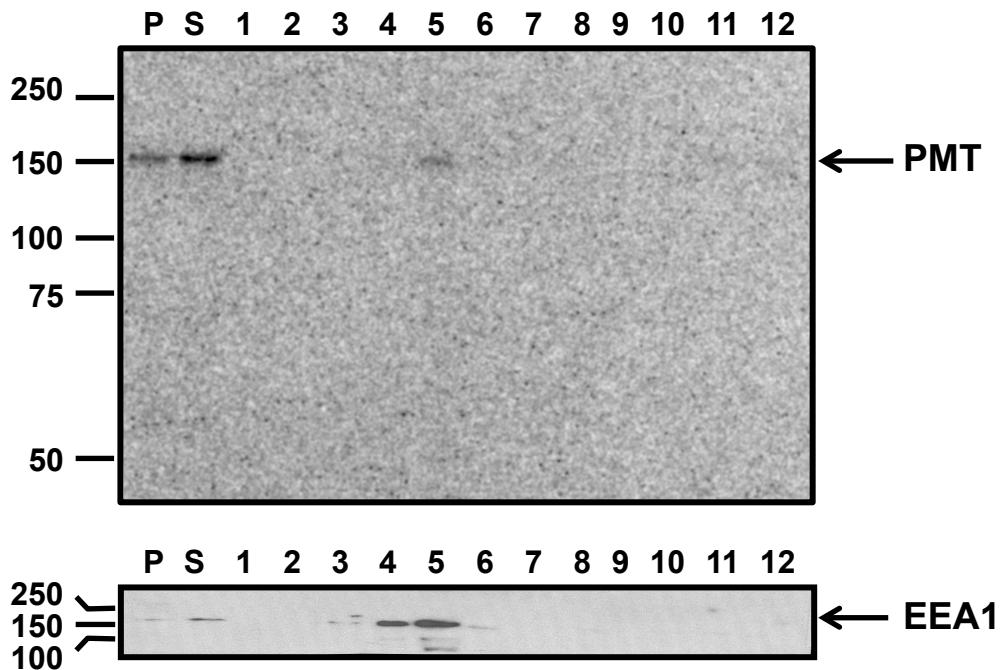

**Supplementary Figure S8. Competition between  $^{125}\text{I}$ -labeled and unlabeled PMT-N for binding to PC and SM in TLC-overlay assay.**  $^{125}\text{I}$ -PMT-N(1-568), 100  $\mu\text{g}$  in 10 ml of PBS, was divided in half, and 5 mL of PBS with (lower panels) or without (upper panels) 2 mg of unlabeled PMT-N(1-568) protein was added. These two solutions were used for TLC-overlay experiment with similarly prepared TLC plates loaded with lipid extract from HEK293 cells, PC (50  $\mu\text{g}$ ) and SM (50  $\mu\text{g}$ ) and developed in a solvent system of 70:30:3 (v/v/v, chloroform/methanol/0.2%  $\text{CaCl}_2$ ). Autoradiographs (right panels) were recorded simultaneously using a phosphoimager before visualization with  $\text{CuSO}_4$  (left panels), as described in the experimental section.

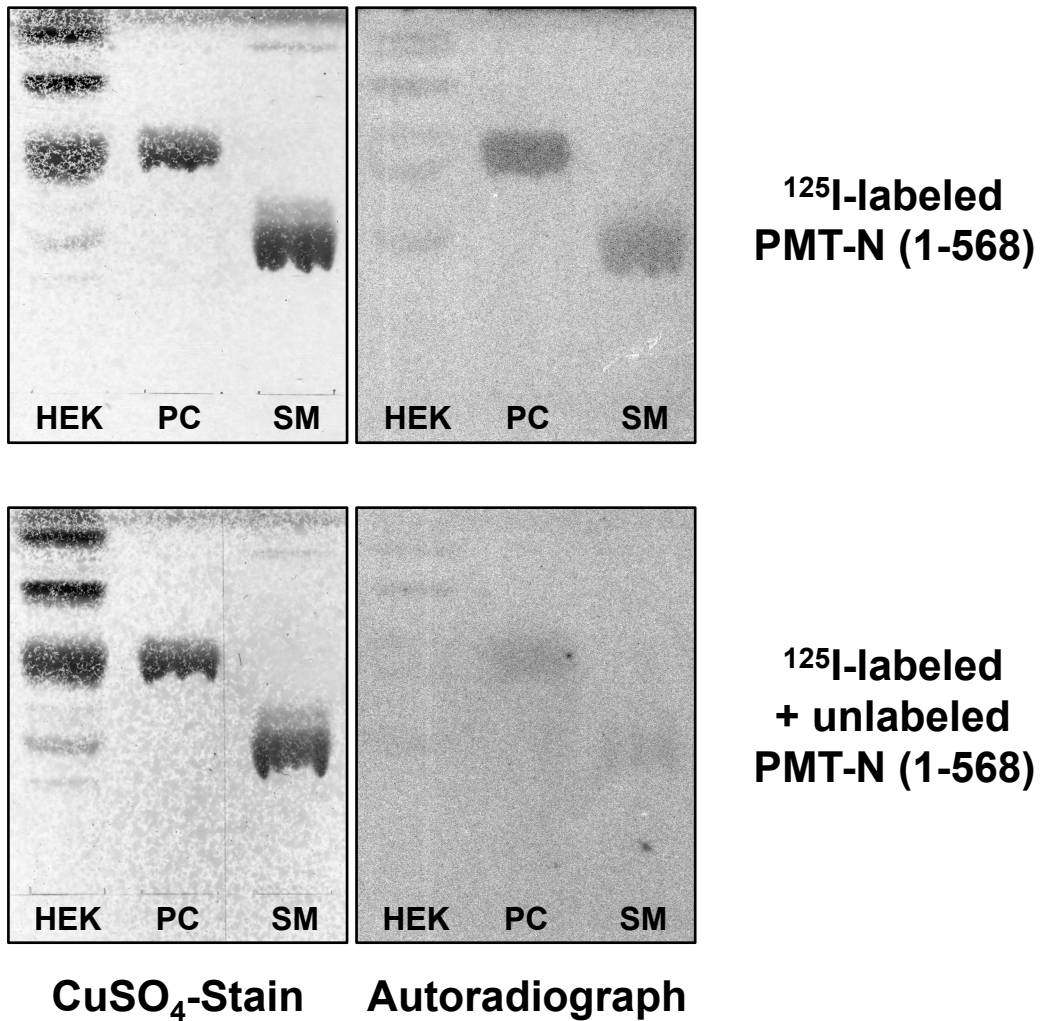



**Supplementary Table S1. P values for comparing PMT-N binding to reconstituted membranes.** Shown are P values calculated with the t-distribution for comparing PMT-N binding characteristics on reconstituted lipids. The degree of freedom used for  $p$  value calculation was based on the number of sets (N) with four traces for Rapid  $B_{max}$  and Rapid  $K_D$ , and the total number of traces (N x 4) for others.

|                                   |                |                |               |               |
|-----------------------------------|----------------|----------------|---------------|---------------|
| <b>Rapid <math>B_{max}</math></b> |                | <b>PC only</b> | <b>PC/PS</b>  | <b>PC/SM</b>  |
|                                   | <b>PC only</b> |                | <b>0.0034</b> | <b>0.0021</b> |
|                                   | <b>PC/PS</b>   | <b>0.0034</b>  |               | <b>0.0018</b> |
|                                   | <b>PC/SM</b>   | <b>0.0021</b>  | <b>0.0018</b> |               |

|                               |                |                |               |               |
|-------------------------------|----------------|----------------|---------------|---------------|
| <b>Rapid <math>K_D</math></b> |                | <b>PC only</b> | <b>PC/PS</b>  | <b>PC/SM</b>  |
|                               | <b>PC only</b> |                | <b>0.0010</b> | <b>0.0024</b> |
|                               | <b>PC/PS</b>   | <b>0.0010</b>  |               | <b>0.0039</b> |
|                               | <b>PC/SM</b>   | <b>0.0024</b>  | <b>0.0039</b> |               |

|                                   |                |                |              |              |
|-----------------------------------|----------------|----------------|--------------|--------------|
| <b>Rapid <math>k_{off}</math></b> |                | <b>PC only</b> | <b>PC/PS</b> | <b>PC/SM</b> |
|                                   | <b>PC only</b> |                | 0.5406       | 0.7226       |
|                                   | <b>PC/PS</b>   | 0.5406         |              | 0.7324       |
|                                   | <b>PC/SM</b>   | 0.7226         | 0.7324       |              |

|                                  |                |                |                |                |
|----------------------------------|----------------|----------------|----------------|----------------|
| <b>Slow <math>B_{max}</math></b> |                | <b>PC only</b> | <b>PC/PS</b>   | <b>PC/SM</b>   |
|                                  | <b>PC only</b> |                | 0.11670        | <b>0.00001</b> |
|                                  | <b>PC/PS</b>   | 0.11670        |                | <b>0.00013</b> |
|                                  | <b>PC/SM</b>   | <b>0.00001</b> | <b>0.00013</b> |                |

|                              |                |                |                |                |
|------------------------------|----------------|----------------|----------------|----------------|
| <b>Slow <math>K_D</math></b> |                | <b>PC only</b> | <b>PC/PS</b>   | <b>PC/SM</b>   |
|                              | <b>PC only</b> |                | 0.02501        | <b>0.00031</b> |
|                              | <b>PC/PS</b>   | 0.02501        |                | <b>0.00001</b> |
|                              | <b>PC/SM</b>   | <b>0.00031</b> | <b>0.00001</b> |                |

|                                  |                |                |                |                |
|----------------------------------|----------------|----------------|----------------|----------------|
| <b>Slow <math>k_{off}</math></b> |                | <b>PC only</b> | <b>PC/PS</b>   | <b>PC/SM</b>   |
|                                  | <b>PC only</b> |                | <b>0.00456</b> | <b>0.00031</b> |
|                                  | <b>PC/PS</b>   | <b>0.00456</b> |                | 0.04026        |
|                                  | <b>PC/SM</b>   | <b>0.00031</b> | 0.04026        |                |

|                                 |                |                |                |                |
|---------------------------------|----------------|----------------|----------------|----------------|
| <b>Slow <math>k_{on}</math></b> |                | <b>PC only</b> | <b>PC/PS</b>   | <b>PC/SM</b>   |
|                                 | <b>PC only</b> |                | 0.30943        | <b>0.00107</b> |
|                                 | <b>PC/PS</b>   | 0.30943        |                | <b>0.00003</b> |
|                                 | <b>PC/SM</b>   | <b>0.00107</b> | <b>0.00003</b> |                |

**Supplementary Table S2. P values for PMT-N binding to natural membranes.**

Shown are P values calculated with the t-distribution for comparing PMT-N binding characteristics on natural and enzyme-treated membranes. The degree of freedom used for *p* value calculation was based on the number of sets (N) with four traces for Rapid  $B_{max}$  and Rapid  $K_D$ , and the total number of traces (N x 4) for others.

**Rapid  $B_{max}$** 

|          | Native          | Trypsin         | SMase           | SMase/T         | PLDCab          | PLDCab/T        | PLDSc           |
|----------|-----------------|-----------------|-----------------|-----------------|-----------------|-----------------|-----------------|
| Native   |                 | <b>0. 00019</b> | <b>0. 01070</b> | <b>0. 00006</b> | <b>0. 00530</b> | <b>0. 00442</b> | <b>0. 00075</b> |
| Trypsin  | <b>0. 00019</b> |                 | <b>0. 00972</b> | <b>0. 00005</b> | <b>0. 00007</b> | <b>0. 00662</b> | <b>0. 00174</b> |
| SMase    | <b>0. 01070</b> | <b>0. 00972</b> |                 | 0. 06867        | <b>0. 01022</b> | <b>0. 01020</b> | <b>0. 00999</b> |
| SMase/T  | <b>0. 00006</b> | <b>0. 00005</b> | 0. 06867        |                 | <b>0. 00005</b> | <b>0. 00005</b> | <b>0. 00005</b> |
| PLDCab   | <b>0. 00530</b> | <b>0. 00007</b> | <b>0. 01022</b> | <b>0. 00005</b> |                 | 0. 12500        | 0. 00200        |
| PLDCab/T | <b>0. 00442</b> | <b>0. 00662</b> | <b>0. 01020</b> | <b>0. 00005</b> | 0. 12500        |                 | 0. 00243        |
| PLDSc    | <b>0. 00075</b> | <b>0. 00174</b> | <b>0. 00999</b> | <b>0. 00005</b> | 0. 00200        | 0. 00243        |                 |

**Rapid  $K_D$** 

|          | Native          | Trypsin         | SMase    | SMase/T         | PLDCab          | PLDCab/T        | PLDSc           |
|----------|-----------------|-----------------|----------|-----------------|-----------------|-----------------|-----------------|
| Native   |                 | 0. 00047        | 0. 02782 | <b>0. 00000</b> | 0. 04590        | 0. 01425        | <b>0. 00102</b> |
| Trypsin  | <b>0. 00047</b> |                 | 0. 01799 | <b>0. 00014</b> | <b>0. 00033</b> | 0. 01999        | 0. 00268        |
| SMase    | 0. 02782        | 0. 01799        |          | 0. 06950        | 0. 02664        | 0. 02215        | 0. 02059        |
| SMase/T  | <b>0. 00000</b> | <b>0. 00014</b> | 0. 06950 |                 | <b>0. 00026</b> | <b>0. 00020</b> | <b>0. 00018</b> |
| PLDCab   | 0. 04590        | <b>0. 00033</b> | 0. 02664 | <b>0. 00026</b> |                 | <b>0. 00248</b> | <b>0. 00010</b> |
| PLDCab/T | 0. 01425        | 0. 01999        | 0. 02215 | <b>0. 00020</b> | <b>0. 00248</b> |                 | <b>0. 01210</b> |
| PLDSc    | <b>0. 00102</b> | 0. 00268        | 0. 02059 | <b>0. 00018</b> | <b>0. 00010</b> | <b>0. 01210</b> |                 |

**Rapid  $k_{off}$** 

|          | Native          | Trypsin         | SMase           | SMase/T         | PLDCab          | PLDCab/T        | PLDSc           |
|----------|-----------------|-----------------|-----------------|-----------------|-----------------|-----------------|-----------------|
| Native   |                 | 0. 60945        | <b>0. 00248</b> | <b>0. 00015</b> | <b>0. 00000</b> | <b>0. 00000</b> | <b>0. 00043</b> |
| Trypsin  | 0. 60945        |                 | <b>0. 00304</b> | <b>0. 00021</b> | <b>0. 00000</b> | <b>0. 00000</b> | <b>0. 00069</b> |
| SMase    | <b>0. 00248</b> | <b>0. 00304</b> |                 | 0. 55732        | 0. 29540        | 0. 08958        | 0. 15497        |
| SMase/T  | <b>0. 00015</b> | <b>0. 00021</b> | 0. 55732        |                 | 0. 55985        | 0. 09566        | 0. 25926        |
| PLDCab   | <b>0. 00000</b> | <b>0. 00000</b> | 0. 29540        | 0. 55985        |                 | 0. 08714        | 0. 43617        |
| PLDCab/T | <b>0. 00000</b> | <b>0. 00000</b> | 0. 08958        | 0. 09566        | 0. 08714        |                 | 0. 71455        |
| PLDSc    | <b>0. 00043</b> | <b>0. 00069</b> | 0. 15497        | 0. 25926        | 0. 43617        | 0. 71455        |                 |

Supplementary Table S2 (continued).

*Slow B<sub>max</sub>*

|          | Native          | Trypsin         | SMase           | SMase/T         | PLDCab          | PLDCab/T        | PLDSc    |
|----------|-----------------|-----------------|-----------------|-----------------|-----------------|-----------------|----------|
| Native   |                 | <b>0. 00031</b> | <b>0. 00007</b> | <b>0. 00176</b> | <b>0. 00000</b> | <b>0. 00009</b> | 0. 00003 |
| Trypsin  | <b>0. 00031</b> |                 | 0. 19828        | 0. 08791        | <b>0. 00013</b> | 0. 30842        | 0. 03425 |
| SMase    | <b>0. 00007</b> | 0. 19828        |                 | 0. 01840        | 0. 01607        | 0. 48796        | 0. 00113 |
| SMase/T  | <b>0. 00176</b> | 0. 08791        | 0. 01840        |                 | <b>0. 00000</b> | <b>0. 00387</b> | 0. 00012 |
| PLDCab   | <b>0. 00000</b> | <b>0. 00013</b> | 0. 01607        | <b>0. 00000</b> |                 | <b>0. 00031</b> | 0. 00318 |
| PLDCab/T | <b>0. 00009</b> | 0. 30842        | 0. 48796        | <b>0. 00387</b> | <b>0. 00031</b> |                 | 0. 13384 |
| PLDSc    | 0. 00003        | 0. 03425        | 0. 00113        | 0. 00012        | 0. 00318        | 0. 13384        |          |

*Slow K<sub>D</sub>*

|          | Native          | Trypsin         | SMase           | SMase/T         | PLDCab          | PLDCab/T | PLDSc    |
|----------|-----------------|-----------------|-----------------|-----------------|-----------------|----------|----------|
| Native   |                 | 0. 23276        | <b>0. 01239</b> | <b>0. 00132</b> | 0. 05050        | 0. 23865 | 1. 00000 |
| Trypsin  | 0. 23276        |                 | <b>0. 00760</b> | <b>0. 00067</b> | <b>0. 00707</b> | 0. 02907 | 0. 09302 |
| SMase    | <b>0. 01239</b> | <b>0. 00760</b> |                 | 0. 67319        | 0. 04130        | 0. 02220 | 0. 01095 |
| SMase/T  | <b>0. 00132</b> | <b>0. 00067</b> | 0. 67319        |                 | 0. 04849        | 0. 02232 | 0. 01158 |
| PLDCab   | 0. 05050        | <b>0. 00707</b> | 0. 04130        | 0. 04849        |                 | 0. 30814 | 0. 03688 |
| PLDCab/T | 0. 23865        | 0. 02907        | 0. 02220        | 0. 02232        | 0. 30814        |          | 0. 11431 |
| PLDSc    | 1. 00000        | 0. 09302        | 0. 01095        | 0. 01158        | 0. 03688        | 0. 11431 |          |

*Slow k<sub>off</sub>*

|          | Native          | Trypsin         | SMase           | SMase/T         | PLDCab          | PLDCab/T        | PLDSc           |
|----------|-----------------|-----------------|-----------------|-----------------|-----------------|-----------------|-----------------|
| Native   |                 | 0. 02887        | 0. 59045        | 0. 38651        | <b>0. 00000</b> | <b>0. 00024</b> | 0. 17290        |
| Trypsin  | 0. 02887        |                 | 0. 20330        | 0. 03413        | <b>0. 00011</b> | <b>0. 00658</b> | 0. 77319        |
| SMase    | 0. 59045        | 0. 20330        |                 | 1. 00000        | <b>0. 00520</b> | 0. 03305        | 0. 25943        |
| SMase/T  | 0. 38651        | 0. 03413        | 1. 00000        |                 | <b>0. 00002</b> | <b>0. 00091</b> | 0. 07725        |
| PLDCab   | <b>0. 00000</b> | <b>0. 00011</b> | <b>0. 00520</b> | <b>0. 00002</b> |                 | 0. 03169        | <b>0. 00022</b> |
| PLDCab/T | <b>0. 00024</b> | <b>0. 00658</b> | 0. 03305        | <b>0. 00091</b> | 0. 03169        |                 | 0. 01450        |
| PLDSc    | 0. 01536        | 0. 25351        | 0. 11539        | 0. 01353        | <b>0. 00146</b> | 0. 11810        |                 |

*Slow k<sub>on</sub>*

|          | Native          | Trypsin         | SMase           | SMase/T         | PLDCab          | PLDCab/T        | PLDSc           |
|----------|-----------------|-----------------|-----------------|-----------------|-----------------|-----------------|-----------------|
| Native   |                 | 0. 08768        | <b>0. 00000</b> | <b>0. 00000</b> | 0. 40862        | 0. 23865        | 0. 30252        |
| Trypsin  | 0. 08768        |                 | <b>0. 00000</b> | <b>0. 00000</b> | 0. 52789        | 0. 61625        | 0. 38466        |
| SMase    | <b>0. 00000</b> | <b>0. 00000</b> |                 | <b>0. 06419</b> | <b>0. 00000</b> | <b>0. 00035</b> | <b>0. 00000</b> |
| SMase/T  | <b>0. 00000</b> | <b>0. 00000</b> | <b>0. 06419</b> |                 | <b>0. 00001</b> | <b>0. 00050</b> | <b>0. 00000</b> |
| PLDCab   | 0. 40862        | 0. 52789        | <b>0. 00000</b> | <b>0. 00001</b> |                 | 1. 00000        | 1. 00000        |
| PLDCab/T | 0. 23865        | 0. 61625        | <b>0. 00035</b> | <b>0. 00050</b> | 1. 00000        |                 | 1. 00000        |
| PLDSc    | 0. 30252        | 0. 38466        | <b>0. 00000</b> | <b>0. 00000</b> | 1. 00000        | 1. 00000        |                 |

**Supplementary Table S3. Receptors of selected protein toxins.**

| Toxins   | Lipid/Glycolipid Receptor                                         | Protein Receptor           |
|----------|-------------------------------------------------------------------|----------------------------|
| CT       | GM <sub>1</sub> [1]                                               |                            |
| DT       |                                                                   | HB-EGF [2]                 |
| PT       | NeuAcα(2,6)-Gal [3], GD <sub>1a</sub> [4]                         |                            |
| α-Toxin  | Phosphatidylcholine [5]                                           |                            |
| δ-Toxin  | GM <sub>2</sub> [6]                                               |                            |
| C2 Toxin | N-linked carbohydrates [7]                                        |                            |
| CNF1     | HSPG [8]                                                          | LRP [9]                    |
| PMT      | SM, PC, LacCer [this study]                                       |                            |
| AnTx     |                                                                   | CMG2 [10]                  |
| BoNT/A   | GD <sub>1a</sub> , GT <sub>1b</sub> , GD <sub>1b</sub> [11]       | SV2 [12]                   |
| BoNT/B   | GD <sub>1a</sub> , GT <sub>1b</sub> , [11, 13]                    | Syt I, Syt II [14]         |
| BoNT/C   | GD <sub>1a</sub> , GT <sub>1b</sub> , GD <sub>1b</sub> [11, 15]   |                            |
| BoNT/D   | GD <sub>1a</sub> , GT <sub>1b</sub> , GD <sub>1b</sub> [11], [16] |                            |
| BoNT/E   | GD <sub>1a</sub> , GT <sub>1b</sub> , GD <sub>1b</sub> [11]       | SV2 [11]                   |
| BoNT/F   | GD <sub>1a</sub> , GT <sub>1b</sub> [11, 17]                      | SV2 [11, 17]               |
| BoNT/G   | GT <sub>1b</sub> [18]                                             | Syt I, Syt II [14, 18]     |
| ETA      |                                                                   | α <sub>2</sub> MR/LRP [19] |
| STx      | Gb3, Gb4 [20]                                                     |                            |
| TeNT     | GT <sub>1b</sub> [21]                                             |                            |
| Tcd      | Galβ1-4GlcNac [22]                                                |                            |
| VacA     | SM [23]                                                           |                            |

Abbreviations: α-Toxin, *Clostridium perfringens* α-toxin; AnTx, anthrax toxin; BoNT/A *C. botulinum* neurotoxins; C2 Toxin, *C. botulinum* C2 toxin; CNF1, cytotoxic necrotizing factor 1; CT, cholera toxin; Delta toxin, *C. perfringens* delta toxin; DT, diphtheria toxin; PT, pertussis toxin; STx, Shiga toxin; Tcd, *C. difficile* toxins; TeNT, tetanus toxin; VacA, *H. pylori* toxin VacA; ETA, *Pseudomonas aeruginosa* exotoxin A; SM, sphingomyelin; GM, monosialotetrahexosylganglioside; Gb, globotriosylceramide; CMG2, human capillary morphogenesis protein 2; SV2, synaptic vesicle protein 2; LRP, laminin receptor precursor; α<sub>2</sub>-MR/LRP, α<sub>2</sub>-macroglobulin receptor/low density lipoprotein receptor-related protein; HB-EGF, heparin-binding EGF-like growth factor.

## References:

1. Cumar, F.A., B. Maggio, and R. Caputto, *Ganglioside-Cholera Toxin Interactions - a Binding and Lipid Monolayer Study*. Molecular and Cellular Biochemistry, 1982. **46**(3): p. 155-160.
2. Naglich, J.G., et al., *Expression Cloning of a Diphtheria-Toxin Receptor - Identity with a Heparin-Binding Egf-Like Growth-Factor Precursor*. Cell, 1992. **69**(6): p. 1051-1061.
3. Stein, P.E., et al., *Structure of a Pertussis Toxin Sugar Complex as a Model for Receptor-Binding*. Nature Structural Biology, 1994. **1**(9): p. 591-596.
4. Janshoff, A., et al., *Quartz crystal microbalance investigation of the interaction of bacterial toxins with ganglioside containing solid supported membranes*. Eur Biophys J, 1997. **26**(3): p. 261-70.
5. Jepson, M., et al., *Differences in the carboxy-terminal (putative phospholipid binding) domains of Clostridium perfringens and Clostridium bifermentans phospholipases C influence the hemolytic and lethal properties of these enzymes*. Infection and Immunity, 1999. **67**(7): p. 3297-3301.
6. Jolivetreynaud, C., B. Hauttecoeur, and J.E. Alouf, *Interaction of Clostridium-Perfringens-Delta-Toxin with Erythrocyte and Liposome Membranes and Relation with the Specific Binding to the Ganglioside Gm2*. Toxicon, 1989. **27**(10): p. 1113-1126.
7. Eckhardt, M., et al., *Binding of Clostridium botulinum C2 toxin to asparagine-linked complex and hybrid carbohydrates*. Journal of Biological Chemistry, 2000. **275**(4): p. 2328-2334.
8. Blumenthal, B., et al., *The cytotoxic necrotizing factors from Yersinia pseudotuberculosis and from Escherichia coli bind to different cellular receptors but take the same route to the cytosol*. Infection and Immunity, 2007. **75**(7): p. 3344-3353.
9. Chung, J.W., et al., *37-kDa laminin receptor precursor modulates cytotoxic necrotizing factor 1-mediated RhoA activation and bacterial uptake*. Journal of Biological Chemistry, 2003. **278**(19): p. 16857-16862.
10. Scobie, H.M., et al., *Human capillary morphogenesis protein 2 functions as an anthrax toxin receptor*. Proceedings of the National Academy of Sciences of the United States of America, 2003. **100**(9): p. 5170-5174.
11. Rummel, A., et al., *Botulinum neurotoxins C, E and F bind gangliosides via a conserved binding site prior to stimulation-dependent uptake with botulinum neurotoxin F utilising the three isoforms of SV2 as second receptor*. Journal of Neurochemistry, 2009. **110**(6): p. 1942-1954.
12. Dong, M., et al., *SV2 is the protein receptor for botulinum neurotoxin A*. Science, 2006. **312**(5773): p. 592-596.
13. Nishiki, T., et al., *The high-affinity binding of Clostridium botulinum type B neurotoxin to synaptotagmin II associated with gangliosides G(T1b)/G(D1a)*. Febs Letters, 1996. **378**(3): p. 253-257.
14. Dong, M., et al., *Synaptotagmins I and II mediate entry of botulinum neurotoxin B into cells*. J Cell Biol, 2003. **162**(7): p. 1293-303.
15. Tsukamoto, K., et al., *Binding of Clostridium botulinum type C and D neurotoxins to ganglioside and phospholipid - Novel insights into the receptor for clostridial neurotoxins*. Journal of Biological Chemistry, 2005. **280**(42): p. 35164-35171.

16. Strotmeier, J., et al., *Botulinum neurotoxin serotype D attacks neurons via two carbohydrate-binding sites in a ganglioside-dependent manner*. *Biochem J*, 2010. **431**(2): p. 207-16.
17. Fu, Z.J., et al., *Glycosylated SV2 and Gangliosides as Dual Receptors for Botulinum Neurotoxin Serotype F*. *Biochemistry*, 2009. **48**(24): p. 5631-5641.
18. Schmitt, J., et al., *Structural Analysis of Botulinum Neurotoxin Type G Receptor Binding*. *Biochemistry*, 2010. **49**(25): p. 5200-5205.
19. Kounnas, M.Z., W.S. Argraves, and D.K. Strickland, *The 39-Kda Receptor-Associated Protein Interacts with 2 Members of the Low-Density-Lipoprotein Receptor Family, Alpha-2-Macroglobulin Receptor and Glycoprotein-330*. *Journal of Biological Chemistry*, 1992. **267**(29): p. 21162-21166.
20. Keusch, G.T., M. Jacewicz, and A. Donohuerolfe, *Pathogenesis of Shigella Diarrhea - Evidence for an N-Linked Glycoprotein Shigella Toxin Receptor and Receptor Modulation by Beta-Galactosidase*. *Journal of Infectious Diseases*, 1986. **153**(2): p. 238-248.
21. Herreros, J., T. Ng, and G. Schiavo, *Lipid rafts act as specialized domains for tetanus toxin binding and internalization into neurons*. *Molecular Biology of the Cell*, 2001. **12**(10): p. 2947-2960.
22. Voth, D.E. and J.D. Ballard, *Clostridium difficile toxins: Mechanism of action and role in disease*. *Clinical Microbiology Reviews*, 2005. **18**(2): p. 247-+.
23. Gupta, V.R., et al., *Sphingomyelin functions as a novel receptor for Helicobacter pylori VacA*. *Plos Pathogens*, 2008. **4**(5): p. -.
